# Supplementary material
Source: publisher figshare collection journal article supplement (https://acs.figshare.com/ndownloader/files/5458577)
Supplement: Supplementary file 1 [file 5458577]

## Supporting Information

### **Measurement and Correlation of the Physicochemical Properties of Novel Aqueous Bis(3-aminopropyl)amine and Its Blend with N- Methyldiethanolamine for CO<sub>2</sub> Capture**

**Bisweswar Das, Binay Deogam, Yatindra Agrawal and Bishnupada Mandal\***

Department of Chemical Engineering, Indian Institute of Technology Guwahati,  
Guwahati - 781039, India.

\*Corresponding author phone Telephone: 91-361-2582256 (O)/2584256 (R). Fax: 91-361-2582291.  
Email: [bpmandal@iitg.ernet.in](mailto:bpmandal@iitg.ernet.in)

Number of Tables: 4

Number of Figures: 6

Number of Pages: 10

Density ( $\rho$ ) and viscosity ( $\eta$ ) of pure APA and Henry's Constant ( $H_{N_2O}$ ) in pure APA are calculated at various temperatures ( $T$ )= (298 to 323) K. Experimental data of these properties correlated by following equations

$$\rho / \text{kg} \cdot \text{m}^{-3} = a + b(T / \text{K}) + c(T / \text{K})^2 \quad (1)$$

$$\eta / \text{mPa} \cdot \text{s} = a + b(T / \text{K}) + c(T / \text{K})^2 \quad (2)$$

$$H_{N_2O} / \text{kPa} \cdot \text{m}^3 \cdot \text{kmol}^{-1} = a \exp(b / (T / \text{K})) \quad (3)$$

**Table S1. Density  $\rho$ , Viscosity  $\eta$ , Molality  $M_{N_2O}$ , and Henry's Constant,  $H_{N_2O}$ , of Pure APA at Different Temperature  $T^a$**

| $T/(\text{K})$ | $\rho/\text{kg}\cdot\text{m}^{-3}$ | $\eta/\text{mPa}\cdot\text{s}$ | $M_{N_2O}/\text{mol}\cdot\text{kg}^{-1}$ | $H_{N_2O}\cdot 10^{-3}/\text{kPa}\cdot\text{kg}\cdot\text{kmol}^{-1}$ |
|----------------|------------------------------------|--------------------------------|------------------------------------------|-----------------------------------------------------------------------|
| 298            | 927.36                             | 8.51                           | 0.0493                                   | 2054                                                                  |
| 303            | 923.34                             | 7.04                           | 0.0466                                   | 2174                                                                  |
| 308            | 919.32                             | 5.92                           | 0.0442                                   | 2294                                                                  |
| 313            | 915.28                             | 5.05                           | 0.0419                                   | 2421                                                                  |
| 318            | 911.18                             | 4.62                           | 0.0396                                   | 2556                                                                  |
| 323            | 906.97                             | 3.99                           | 0.0376                                   | 2695                                                                  |

<sup>a</sup>Standard uncertainties  $u$  for density, viscosity and Henry's Constant  $u(T) = 0.25$  K and  $u(p) = 0.2$  kPa. The combined expanded uncertainty for density measurement  $U_c(\rho) = 4.07$  kg·m<sup>-3</sup> for viscosity measurement  $U_c(\eta) = 0.113$  mPa·s, and for solubility measurement uncertainty in terms of molality  $U_c(M_{N_2O}) = 4.07 \cdot 10^{-4}$  mol·kg<sup>-1</sup> and Henry constant  $U_c(H_{N_2O}) = 22.27 \cdot 10^3$  kPa·kg·kmol<sup>-1</sup> (95% level of confidence,  $k=2$ ).

**Table S2. Parameters of Density, Viscosity and Henry's Constant for pure APA<sup>a</sup>**

| parameters        | density               | viscosity             | Henry's Constant     |
|-------------------|-----------------------|-----------------------|----------------------|
| $a$               | 1032.1                | 539.31                | $9.743 \cdot 10^4$   |
| $b$               | $79.61 \cdot 10^{-2}$ | -3.262                | $-1.1281 \cdot 10^3$ |
| $c$               | $14.47 \cdot 10^{-4}$ | $4.971 \cdot 10^{-3}$ |                      |
| <sup>a</sup> AAD% | $1.56 \cdot 10^{-2}$  | 1.38                  | 0.15                 |

Figure S1 shows the variation of Henry's law constant of CO<sub>2</sub> in pure water at various temperatures.

Figure S2 shows the variation of Henry's law constant of N<sub>2</sub>O in pure water at various temperatures.

Figure S3 shows the variation of Diffusivity of CO<sub>2</sub> in pure water at various temperatures.

Figure S4 shows the variation of Diffusivity of N<sub>2</sub>O in pure water at various temperatures.

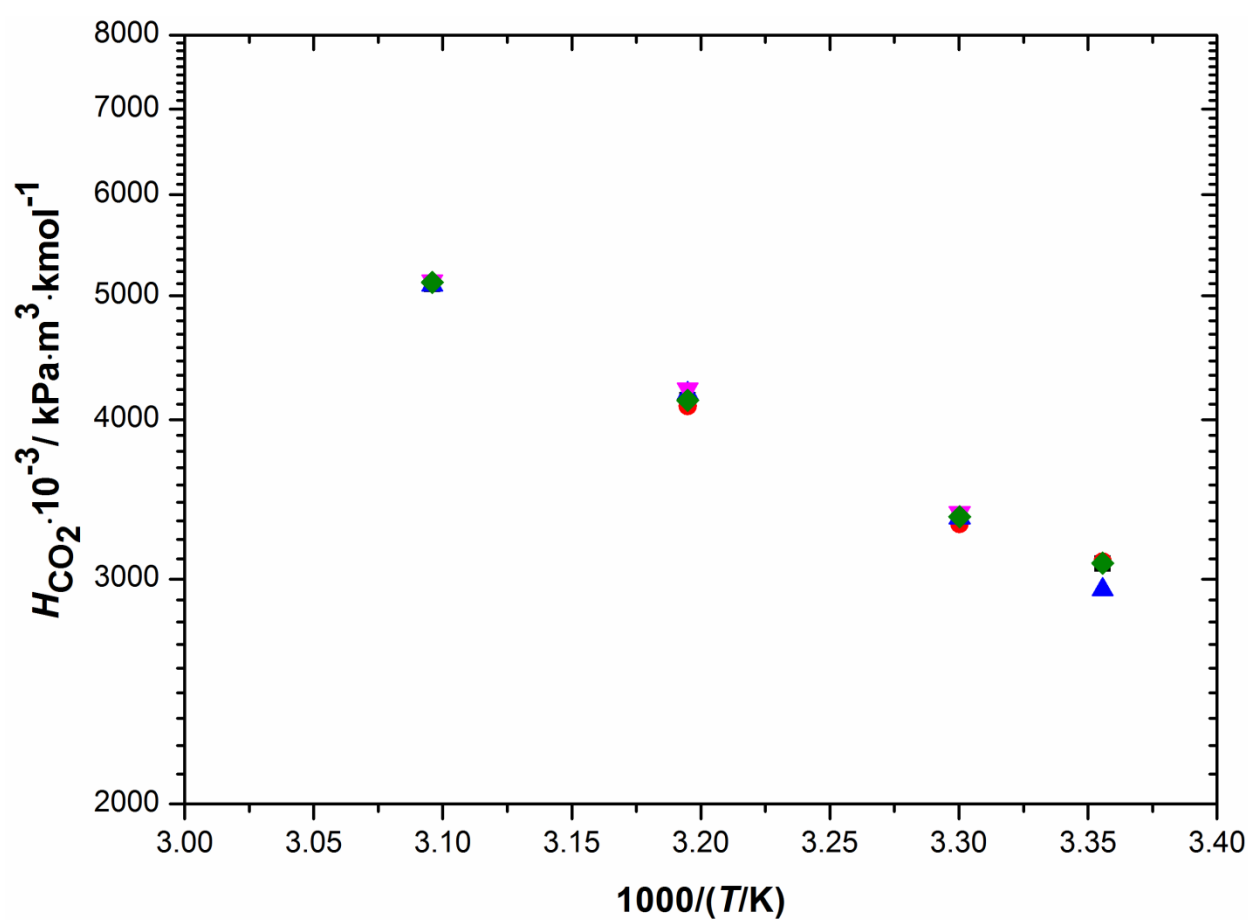

**Figure S1.** Henry's law constant of CO<sub>2</sub> ( $H_{CO_2}$ ) in water as a function of temperature ( $T$ ): ■, Paul et al.<sup>26</sup>; ●, Mandal et al.<sup>27</sup>; ▲, Al-Ghawas et al.<sup>22</sup>; ▼, Li and Lai<sup>28</sup>; ◆, this study.

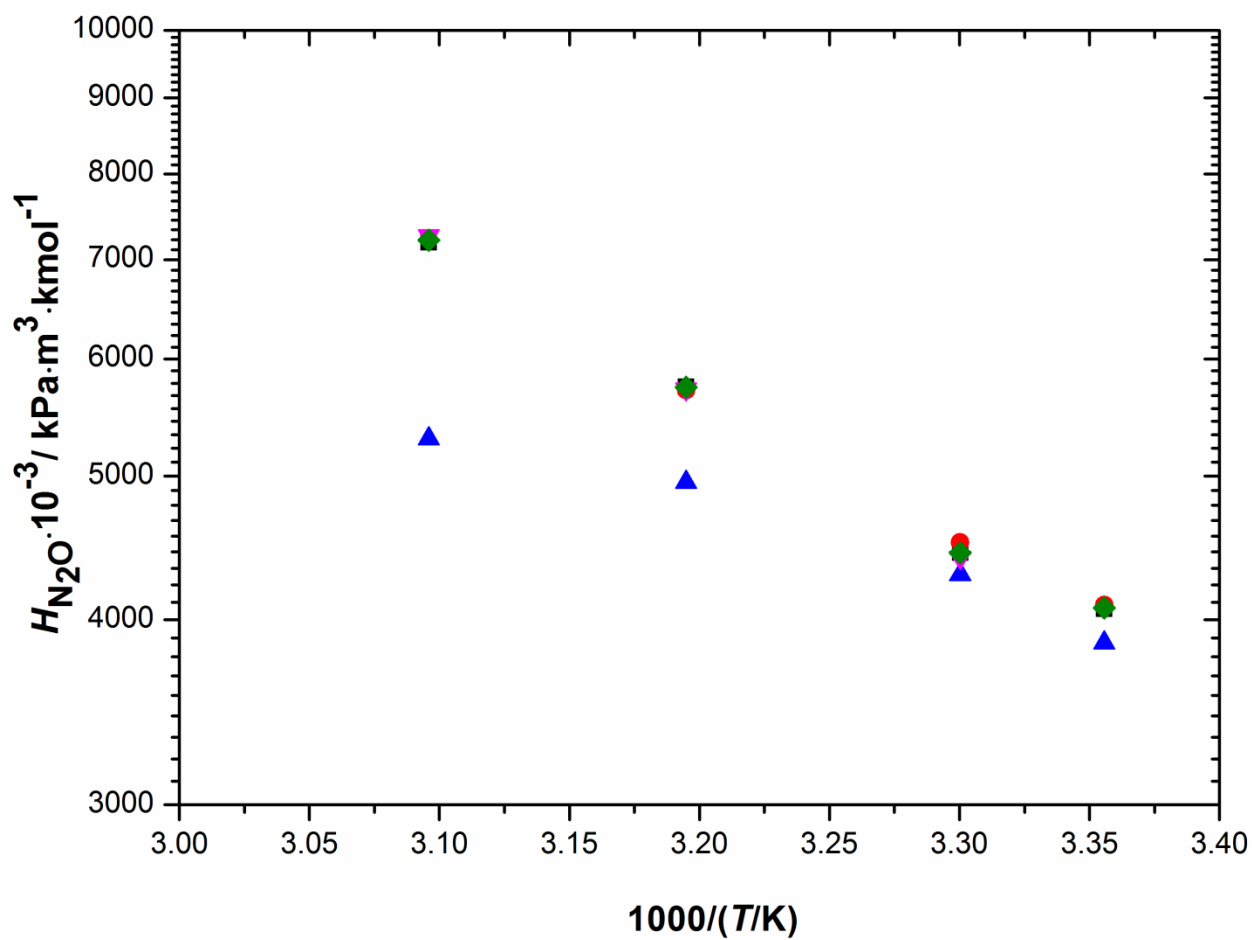

**Figure S2.** Henry's law constant of  $N_2O$  ( $H_{N_2O}$ ) in water as a function of temperature ( $T$ ): ■, Paul et al.<sup>26</sup>; ●, Mandal et al.<sup>27</sup>; ▲, Al-Ghawas et al.<sup>22</sup>; ▼, Li and Lai<sup>28</sup>; ◆, this study.

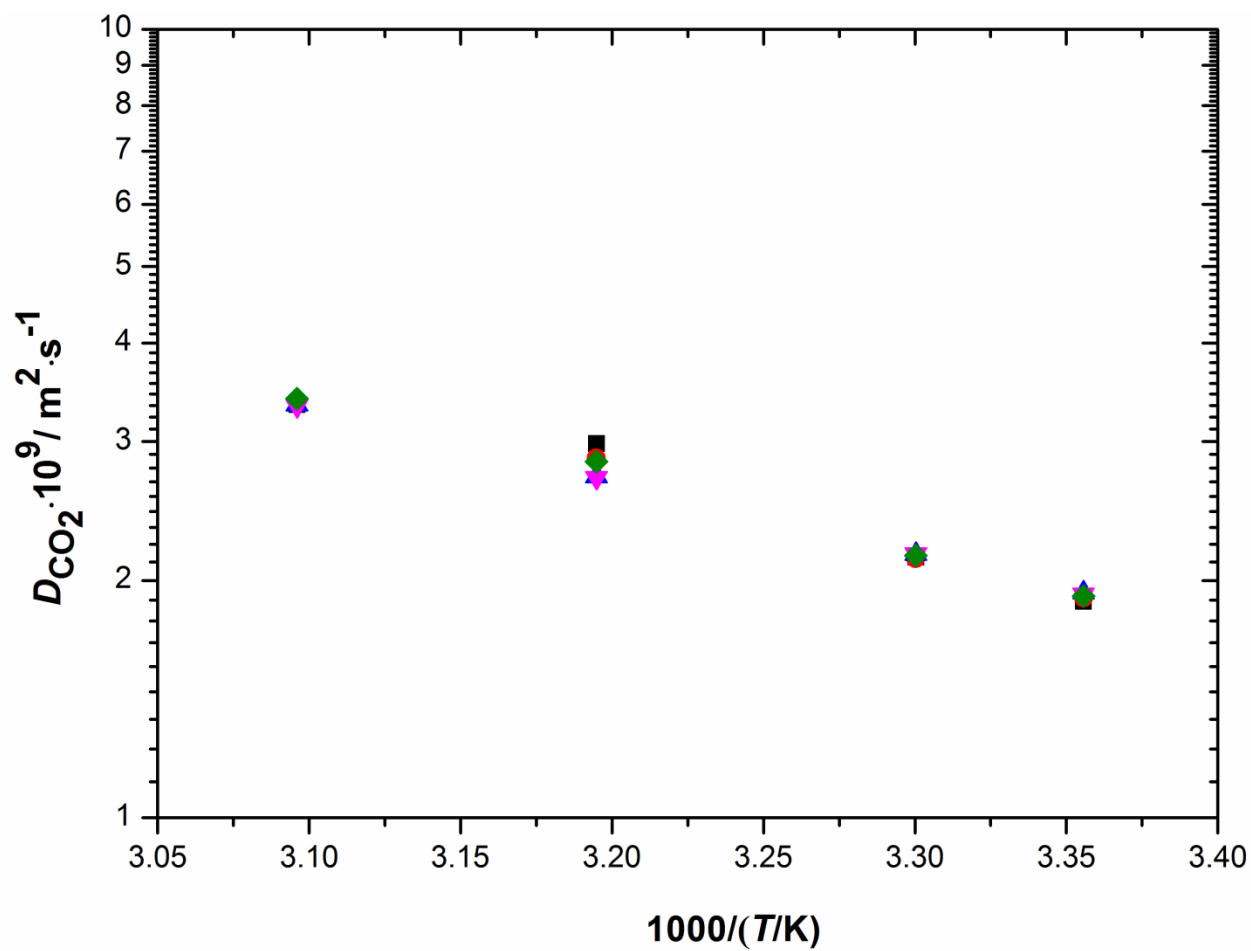

**Figure S3.** Diffusivity of CO<sub>2</sub> ( $D_{\text{CO}_2}$ ) in water as a function of temperature: ■, Paul et al.<sup>26</sup>; ●, Mandal et al.<sup>27</sup>; ▲, Al-Ghawas et al.<sup>22</sup>; ▼, Li and Lai<sup>28</sup>; ◆, this study.

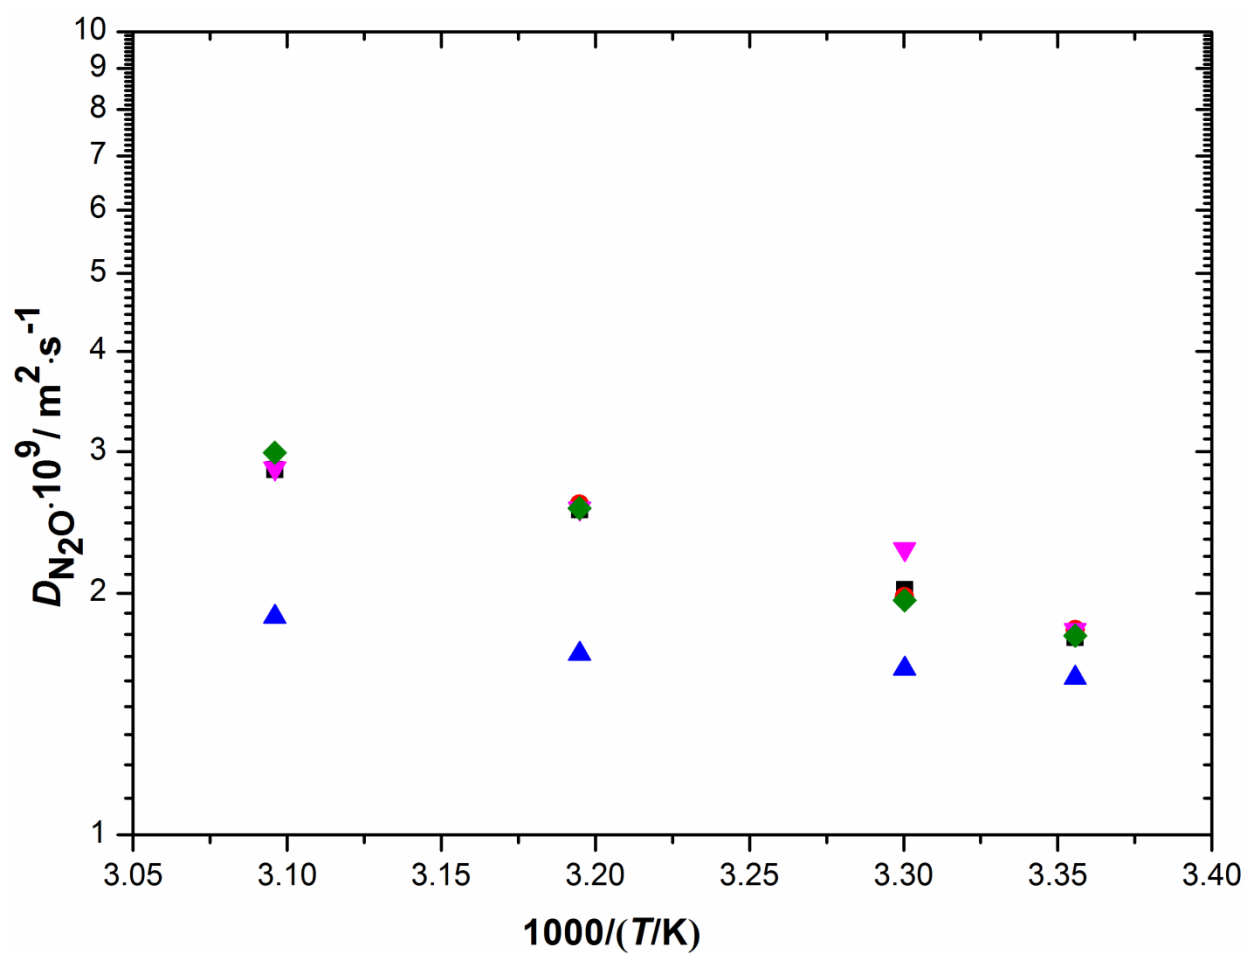

**Figure S4.** Diffusivity of N<sub>2</sub>O ( $D_{\text{N}_2\text{O}}$ ) in water as a function of temperature: ■, Paul et al.<sup>26</sup>; ●, Mandal et al.<sup>27</sup>; ▲, Al-Ghawas et al.<sup>22</sup>; ▼, Versteeg and van Swaaij.<sup>31</sup>; ◆, this study.

Multiple experimental data of density ( $\rho$ ) and viscosity ( $\eta$ ) of pure MDEA, and 10, 20 and 30 weight % of MDEA water solution are compared with various literature data<sup>22, 32-36</sup> as shown in figures S5 and S6 with the AAD of 0.07% and 0.92%, respectively.

Figure S5 shows the variation of experimental data of density of pure MDEA and aqueous MDEA solutions at various temperatures.

Figure S6 shows the variations of experimental data of viscosity of pure MDEA and aqueous MDEA solutions at various temperatures.

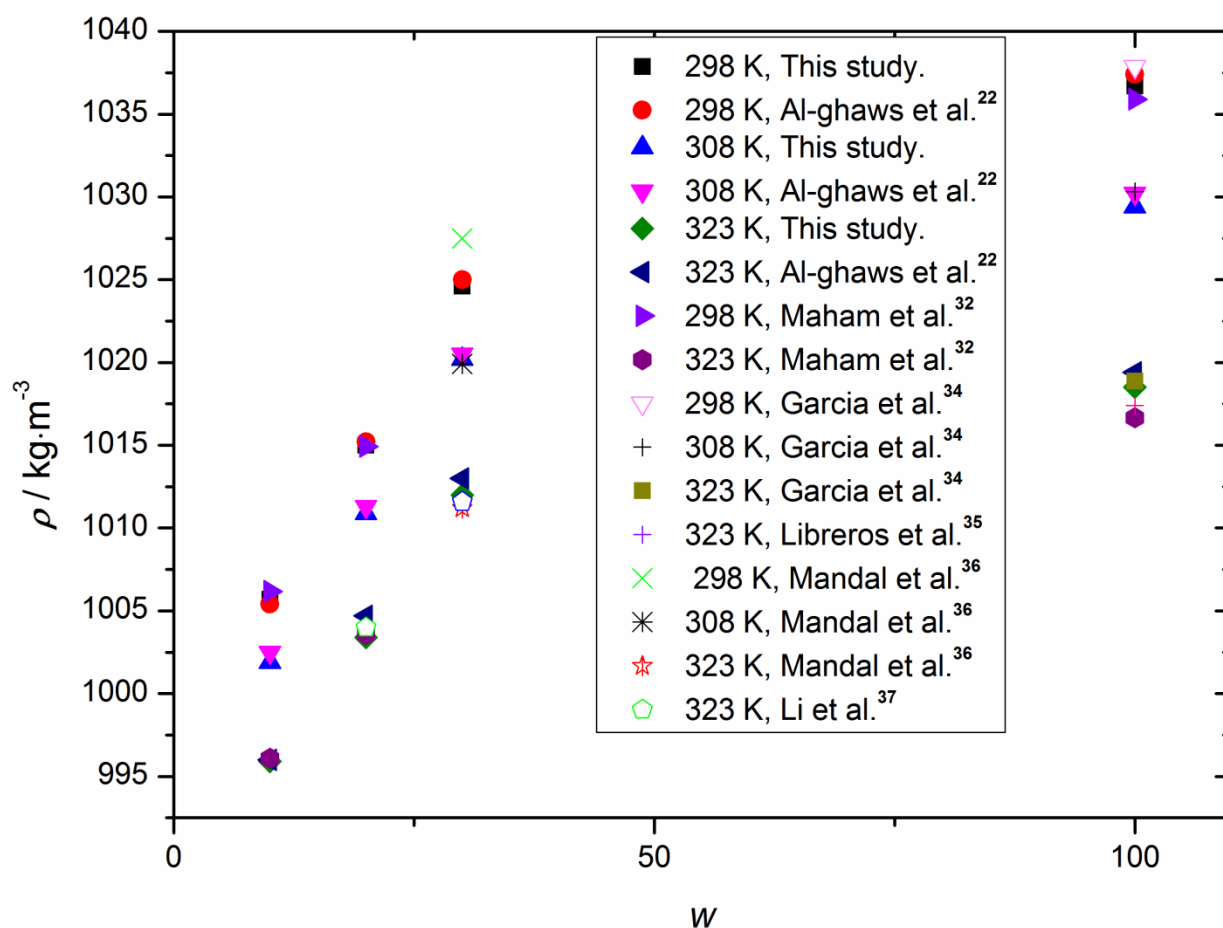

**Figure S5.** Experimental density data as a function of temperature and weight %.

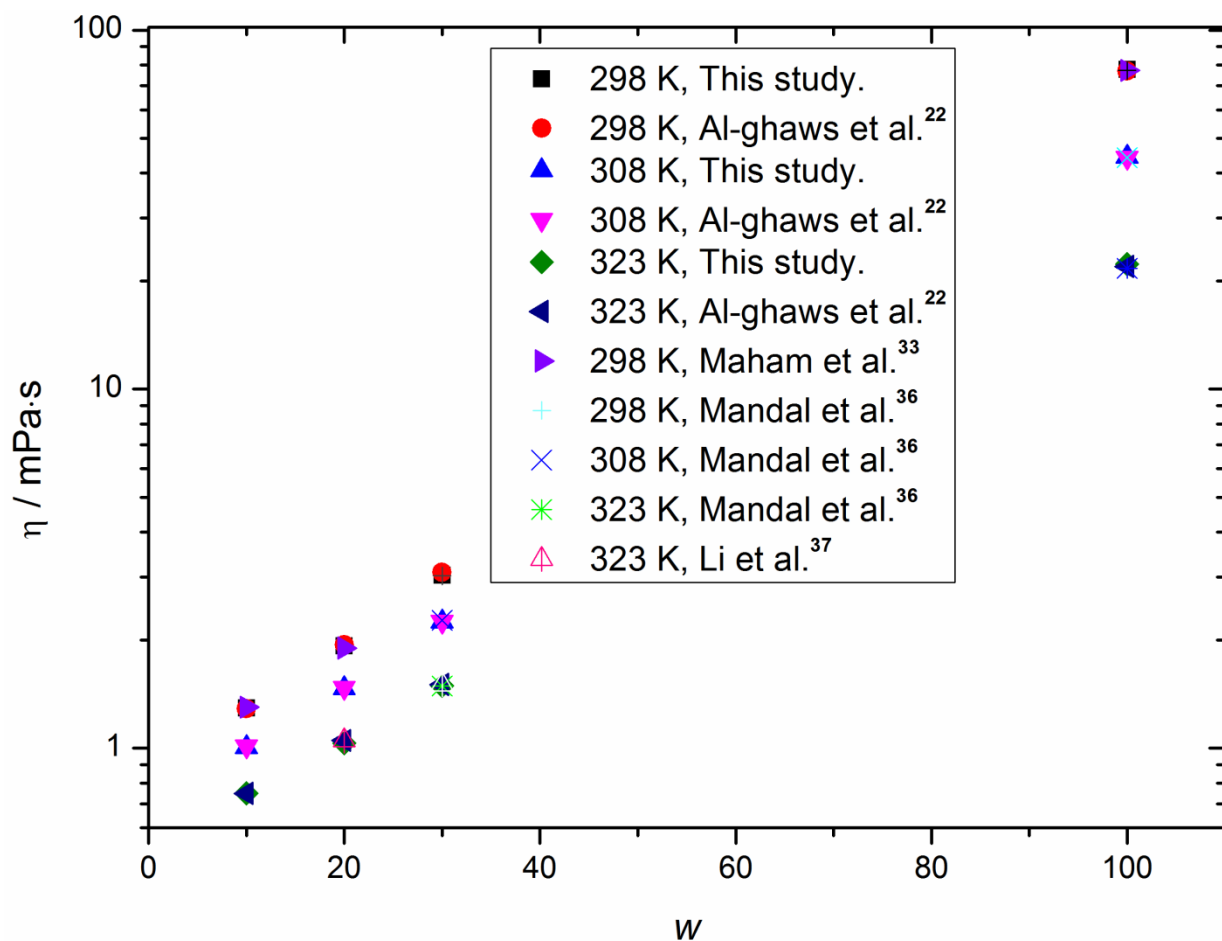

**Figure S6.** Experimental viscosity data at as a function of temperature and weight %.



The amount of N<sub>2</sub>O absorbed at various concentrations and temperature as shown below in table S3 and S4.

**Table S3. Measured Solubility of N<sub>2</sub>O in APA (1) + H<sub>2</sub>O (2) at various Temperatures as a Function of Molality  $m$  at a pressure 0.1 MPa<sup>a</sup>**

| $m_1 / \text{mol} \cdot \text{kg}^{-1}$ | $M_{\text{N}_2\text{O}} / \text{mol} \cdot \text{kg}^{-1}$ |        |        |        |        |        |
|-----------------------------------------|------------------------------------------------------------|--------|--------|--------|--------|--------|
|                                         | 298K                                                       | 303K   | 308K   | 313K   | 318K   | 323K   |
| 0.102                                   | 0.0250                                                     | 0.0226 | 0.0211 | 0.0192 | 0.0176 | 0.0162 |
| 0.313                                   | 0.0240                                                     | 0.0218 | 0.0203 | 0.0186 | 0.0171 | 0.0158 |
| 0.537                                   | 0.0231                                                     | 0.0212 | 0.0197 | 0.0181 | 0.0167 | 0.0154 |
| 0.773                                   | 0.0224                                                     | 0.0207 | 0.0193 | 0.0177 | 0.0163 | 0.0150 |
| 1.024                                   | 0.0218                                                     | 0.0202 | 0.0188 | 0.0173 | 0.0159 | 0.0148 |
| 1.291                                   | 0.0213                                                     | 0.0197 | 0.0183 | 0.0168 | 0.0155 | 0.0144 |

<sup>a</sup>Standard uncertainties  $u$  are  $u(T) = 0.25$  K,  $u(m) = 0.001$  mol·kg<sup>-1</sup>,  $u(p) = 0.2$  kPa. The combined expanded uncertainty for solubility measurement on the molality basis with uncertainty  $U_c(M_{\text{N}_2\text{O}}) = 2.29 \cdot 10^{-4}$  mol·kg<sup>-1</sup> (95% level of confidence,  $k = 2$ ). Solvent = Water.

**Table S4. Measured Solubility of N<sub>2</sub>O in APA (1) + MDEA (2) + H<sub>2</sub>O (3) at various Temperatures as a Function of Molality  $m$  at a pressure 0.1 MPa<sup>a</sup>**

| $m_1/m_2$<br>mol·kg <sup>-1</sup> | $M_{\text{N}_2\text{O}} / \text{mol} \cdot \text{kg}^{-1}$ |        |        |        |        |        |
|-----------------------------------|------------------------------------------------------------|--------|--------|--------|--------|--------|
|                                   | 298K                                                       | 303K   | 308K   | 313K   | 318K   | 323K   |
| 0/4.416                           | 0.0194                                                     | 0.0184 | 0.0173 | 0.0161 | 0.0150 | 0.0139 |
| 0.148/4.294                       | 0.0194                                                     | 0.0183 | 0.0172 | 0.0160 | 0.0149 | 0.0138 |
| 0.447/4.025                       | 0.0192                                                     | 0.0182 | 0.0171 | 0.0160 | 0.0148 | 0.0138 |
| 0.751/3.753                       | 0.0191                                                     | 0.0182 | 0.0170 | 0.0159 | 0.0148 | 0.0138 |
| 1.058/3.478                       | 0.0191                                                     | 0.0181 | 0.0170 | 0.0159 | 0.0147 | 0.0138 |
| 1.371/3.199                       | 0.0190                                                     | 0.0181 | 0.0170 | 0.0158 | 0.0147 | 0.0138 |
| 1.688/2.915                       | 0.0190                                                     | 0.0180 | 0.0169 | 0.0158 | 0.0147 | 0.0138 |

<sup>a</sup>Standard uncertainties  $u$  are  $u(T) = 0.25$  K,  $u(m) = 0.001$  mol·kg<sup>-1</sup>,  $u(p) = 0.2$  kPa. The combined expanded uncertainty for solubility measurement on the molality basis with uncertainty  $U_c(M_{\text{N}_2\text{O}}) = 1.74 \cdot 10^{-4}$  mol·kg<sup>-1</sup> (95% level of confidence,  $k = 2$ ). Solvent = water.

## References

32. Maham, Y.; Teng, T. T.; Mather, A. E.; Hepler, L. G. Volumetric properties of (water + diethanolamine) systems. *Can. J. Chem.* **1995**, *73*, 1514-1519.
33. Teng, T. T.; Maham, Y.; Hepler, L. G.; Mather, A. E. Viscosity of aqueous solutions of *N*-methyldiethanolamine and of diethanolamine. *J. Chem. Eng. Data* **1994**, *39*, 290-293.
34. Garcia, J. M. B.; Estrada, M. R.; Silva G. A. I.; Hall, K.R. Densities and Excess Molar Volumes of Aqueous Solutions of *n*-Methyldiethanolamine (MDEA) at Temperatures from (283.15 to 363.15) K. *J. Chem. Eng. Data* **2003**, *48*, 1442-1445.
35. Libreros, M. E. R.; Trejo, A. Density and Viscosity of Aqueous Blends of Three Alkanolamines: *N*-Methyldiethanolamine, Diethanolamine, and 2-Amino-2-methyl-1-propanol in the Range of (303 to 343) K. *J. Chem. Eng. Data* **2006**, *51*, 702-707.
36. Mandal, B.P.; Kundu, M.; Bandyopadhyay, S. S. Density and Viscosity of Aqueous Solutions of (*N*-Methyldiethanolamine + Monoethanolamine), (*N*-Methyldiethanolamine + Diethanolamine), (2-Amino-2-methyl-1-propanol + Monoethanolamine), and (2-Amino-2-methyl-1-propanol + Diethanolamine). *J. Chem. Eng. Data* **2003**, *48*, 703-707.
37. Li, M. H.; Lie, Y. C. Densities and Viscosities of Solutions of Monoethanolamine +*N*-Methyldiethanolamine + Water and Monoethanolamine + 2-Amino-2-methyl-1 - propanol + Water. *J. Chem. Eng. Data* **1994**, *39*, 444-447.
